# Supplementary material
Source: PubMed Central journal article supplement (PMC6610544)
Supplement: es9b01835_si_001.pdf [file es9b01835_si_001.pdf]

# Supporting Information

## Chlorinated Paraffins in Car Tires recycled to Rubber Granulates and Playground Tiles

Brandsma, Sicco H.<sup>1\*</sup>, Brits, Martin <sup>1,2,3</sup>, Groenewoud, Quinn R.<sup>1</sup>, van Velzen, Martin J.M.<sup>1</sup>,

Leonards, Pim E.G.<sup>1</sup>, De Boer, Jacob <sup>1</sup>

<sup>1</sup>Vrije Universiteit, Dept. Environment and Health, De Boelelaan 1085, 1081 HV, Amsterdam, the Netherlands, <sup>2</sup>National Metrology Institute of South Africa (NMISA), CSIR Campus, Meiring Naude Road, Pretoria 0040, South Africa, <sup>3</sup>Department of Chemistry, Faculty of Natural and Agricultural Sciences, University of Pretoria, Lynnwood Road, Pretoria 0002, South Africa

\*Corresponding author. +31 20 5989566; fax: +31 20 5989553; e-mail:sicco.brandsma@vu.nl

Page number: 10

Figure number: 2

Table number: 6

15 **Solvents, standards and materials**

16 The following eight commercial available CP standard mixtures were used for the deconvolution of  
17 the SCCP, MCCP and LCCP pattern in the rubber samples;

18

19 • Chlorinated paraffin C10-C13 51.5%Cl (SCCP 51.5%Cl)

20 • Chlorinated paraffin C10-C13 55.5%Cl (SCCP 55.5%Cl)

21 • Chlorinated paraffin C10-C13 63% Cl (SCCP 63%Cl)

22 • Chlorinated paraffin C14-C17 42% Cl (MCCP 42%Cl)

23 • Chlorinated paraffin C14-C17 52% Cl (MCCP 52%Cl)

24 • Chlorinated paraffin C14-C17 57% Cl (MCCP 57%Cl)

25 • Chlorinated paraffin C18-C20 36% Cl (LCCP 36%Cl)

26 • Chlorinated paraffin C18-C20 49% Cl (LCCP 49%Cl)

27

28 The concentration of the eight commercial CP standard mixtures was 100 ng/μL and purchased from

29 Dr. Ehrenstorfer GmbH (Augsburg, Germany). All solvents and chemicals used were HPLC analysis

30 grade. N-hexane, acetone, and dichloromethane (DCM) from Promochem (Wesel, Germany) and

31 toluene from VWR Chemicals , acetonitrile (ACN) from Biosolve (Valkenswaard, The Netherlands).

32 were used for cleaning, extraction cleanup and analysis. <sup>13</sup>C<sub>10</sub>-dechlorane plus was used as injection

33 standard and was purchased from Cambridge Isotope Laboratories (Andover, MA, USA). Silicagel (70-

34 230 μm) and sodium sulphate (99%) and sulfuric acid (95-97%) was also purchased from Sigma

35 Aldrich (Zwijndrecht , The Netherlands).

36

37 Table S1. Information (brand, year and country) of the car tires and playground tiles analyzed in this  
 38 study.

| <b>Sample code</b> | <b>Brand</b> | <b>Year</b> | <b>Country</b> |
|--------------------|--------------|-------------|----------------|
| CT1                | Continental  | 2010        | France         |
| CT2                | Kumho        | 2012        | China          |
| CT3                | Continental  | 2012        | Portugal       |
| CT4                | Dunlop       | 2014        | Germany        |
| CT5                | Pirelli      | 2008        | Turkey         |
| CT6                | Pirelli      | 2014        | Brazil         |
| CT7                | Michelin     | 2006        | Spain          |
| CT8                | Continental  | 2012        | Romania        |
| CT9                | Goodyear     | 2011        | Slovenia       |
| CT10               | Continental  | 2013        | Czech          |

39

| <b>Sample code</b> | <b>Year purchased</b> | <b>Country</b>  |
|--------------------|-----------------------|-----------------|
| PGT1               | 2018                  | The Netherlands |
| PGT2               | 2018                  | The Netherlands |
| PGT3               | 2018                  | The Netherlands |
| PGT4               | 2018                  | The Netherlands |
| PGT5               | 2018                  | The Netherlands |
| PGT6               | 2018                  | Spain           |

40

41 Table S2. Instrumental parameters LC-APCI-qTOF-MS.

| <b>Instrument setting</b>   | <b>Value</b>                               |
|-----------------------------|--------------------------------------------|
| Ionisation source           | APCI, negative mode                        |
| Eluent                      | Dichloromethane (10%, v/v) in acetonitrile |
| Run time                    | 4 min                                      |
| Isocratic flow              | 250 $\mu$ L/min                            |
| Vaporizer temperature       | 300°C                                      |
| Dry temperature             | 200°C                                      |
| Ion energy                  | 5.0 eV                                     |
| Collision energy (CE)       | 2.0 eV                                     |
| MS scan range               | 100-2000 m/z                               |
| End plate offset            | 500 V                                      |
| Capillary                   | 1000 V                                     |
| Corona                      | 6000 nA                                    |
| Nebulizer (N <sub>2</sub> ) | 2.0 L/min                                  |
| Dry Gas                     | 2.0 L/min                                  |

42

43

44 Table S3. Results of the spike experiments of the car tires (CT), rubber granulates (RG) and  
 45 playground tiles (PGT).

|      | Amount spike ng | Measured spike ng | Recovery SCCPs | R <sup>2</sup> | Amount spike ng | Measured spike ng | Recovery MCCPs | R <sup>2</sup> | Amount spike ng | Measured spike ng | Recovery LCCPs | R <sup>2</sup> |
|------|-----------------|-------------------|----------------|----------------|-----------------|-------------------|----------------|----------------|-----------------|-------------------|----------------|----------------|
| RG7  | 143             | 214               | 150%           | 0.97           | 700             | 849               | 121%           | 0.97           | 134             | 156               | 116%           | 0.99           |
| RG6  | 143             | 151               | 106%           | 0.99           | 700             | 571               | 82%            | 0.98           | 134             | 91                | 68%            | 1.00           |
| RG2  | 143             | 135               | 94%            | 0.93           | 700             | 589               | 84%            | 0.98           | 134             | 103               | 77%            | 1.00           |
| PGT2 | 143             | 182               | 127%           | 0.99           | 700             | 705               | 101%           | 0.98           | 134             | 129               | 96%            | 1.00           |
| PGT6 | 143             | 201               | 141%           | 0.81           | 700             | 797               | 114%           | 0.96           | 134             | 101               | 75%            | 0.99           |
| PGT4 | 143             | 215               | 150%           | 0.99           | 700             | 925               | 132%           | 0.97           | 134             | 178               | 132%           | 1.00           |
| CT8  | 143             | 210               | 147%           | 0.99           | 700             | 909               | 130%           | 0.96           | 134             | 202               | 151%           | 1.00           |
| CT9  | 143             | 173               | 121%           | 0.99           | 700             | 682               | 97%            | 0.96           | 134             | 138               | 103%           | 1.00           |
| CT5  | 143             | 181               | 127%           | 0.99           | 700             | 664               | 95%            | 0.97           | 134             | 133               | 99%            | 1.00           |
|      |                 | Mean              | 129%           |                |                 | Mean              | 106%           |                |                 | Mean              | 102%           |                |
|      |                 | RSD               | 15%            |                |                 | RSD               | 18%            |                |                 | RSD               | 27%            |                |

46

47 Table S4. CP levels in  $\mu\text{g/g}$  in the NIST SRM2585.

48

|       | $\Sigma\text{SCCPs } (\mu\text{g/g})$ | $R^2$ | %Cl   | $\Sigma\text{MCCPs } (\mu\text{g/g})$ | $R^2$ | %Cl   | $\Sigma\text{LCCPs } (\mu\text{g/g})$ | $R^2$ | %Cl   |
|-------|---------------------------------------|-------|-------|---------------------------------------|-------|-------|---------------------------------------|-------|-------|
| SRM1  | 7.4                                   | 0.90  | 59.2% | 9.9                                   | 0.77  | 52.0% | 17                                    | 0.01  | 42.5% |
| SRM2  | 7.0                                   | 0.90  | 59.2% | 9.6                                   | 0.77  | 51.9% | 16                                    | 0.01  | 42.6% |
| SRM3  | 7.0                                   | 0.99  | 59.2% | 9.5                                   | 0.59  | 51.9% | 16                                    | 0.01  | 42.6% |
| Mean  | 7.1                                   |       |       | 9.7                                   |       |       | 16                                    |       |       |
| Stdev | 0.2                                   |       |       | 0.2                                   |       |       | 0.4                                   |       |       |

49

50

51 Table S5. Concentrations in µg/g for the SCCPs, MCCPs and LCCPs and percentage contribution of the  
 52 congener carbon chain lengths. Goodness of fit (R<sup>2</sup>) below 0.5 are given in highlighted red with  
 53 indicate that the reported values is tentative.

|        | C10<br>(%) | C11<br>(%) | C12<br>(%) | C13<br>(%) | ∑SCCPs<br>(µg/g) | R <sup>2</sup> | C14<br>(%) | C15<br>(%) | C16<br>(%) | C17<br>(%) | ∑MCCPs<br>(µg/g) | R <sup>2</sup> |
|--------|------------|------------|------------|------------|------------------|----------------|------------|------------|------------|------------|------------------|----------------|
| RG1    | 7%         | 25%        | 33%        | 35%        | 4.8              | <b>0.6</b>     | 45%        | 27%        | 17%        | 11%        | 45%              | <b>0.8</b>     |
| RG2    | 6%         | 23%        | 33%        | 37%        | 9.1              | <b>0.2</b>     | 39%        | 33%        | 18%        | 10%        | 39%              | <b>0.8</b>     |
| RG3    | 7%         | 18%        | 31%        | 44%        | 2.2              | <b>0.8</b>     | 46%        | 24%        | 18%        | 13%        | 46%              | <b>0.9</b>     |
| RG4.1  | 10%        | 33%        | 34%        | 22%        | 7.2              | <b>0.1</b>     | 48%        | 27%        | 14%        | 10%        | 48%              | <b>0.9</b>     |
| RG4.2  | 10%        | 28%        | 30%        | 31%        | 6.1              | <b>0.3</b>     | 44%        | 25%        | 17%        | 14%        | 44%              | <b>0.9</b>     |
| RG5    | 5%         | 20%        | 28%        | 47%        | 2.1              | <b>0.8</b>     | 41%        | 23%        | 18%        | 17%        | 41%              | <b>0.8</b>     |
| RG6    | 6%         | 20%        | 26%        | 48%        | 2.3              | <b>0.8</b>     | 39%        | 24%        | 20%        | 17%        | 39%              | <b>0.7</b>     |
| RG7    | 6%         | 20%        | 29%        | 46%        | 6.2              | <b>0.8</b>     | 41%        | 25%        | 19%        | 14%        | 41%              | <b>0.8</b>     |
| RG8    | 6%         | 17%        | 22%        | 55%        | 7.8              | <b>0.7</b>     | 40%        | 27%        | 18%        | 15%        | 40%              | <b>0.8</b>     |
| RG9    | 6%         | 21%        | 25%        | 48%        | 2.7              | <b>0.8</b>     | 37%        | 27%        | 21%        | 16%        | 37%              | <b>0.7</b>     |
| PGT1   | 6%         | 18%        | 32%        | 44%        | 1.9              | <b>0.8</b>     | 43%        | 25%        | 18%        | 14%        | 43%              | <b>0.8</b>     |
| PGT2   | 12%        | 31%        | 11%        | 46%        | 2.6              | <b>0.6</b>     | 47%        | 27%        | 15%        | 11%        | 47%              | <b>0.9</b>     |
| PGT3   | 2%         | 14%        | 24%        | 60%        | 4.8              | <b>0.7</b>     | 55%        | 24%        | 11%        | 9%         | 55%              | <b>1.0</b>     |
| PGT4   | 5%         | 24%        | 27%        | 45%        | 4.7              | <b>0.8</b>     | 50%        | 25%        | 14%        | 11%        | 50%              | <b>0.9</b>     |
| PGT5.1 | 4%         | 18%        | 23%        | 55%        | 6.3              | <b>0.5</b>     | 53%        | 26%        | 13%        | 9%         | 53%              | <b>1.0</b>     |
| PGT5.2 | 2%         | 8%         | 11%        | 79%        | 6.5              | <b>0.4</b>     | 55%        | 27%        | 11%        | 6%         | 55%              | <b>1.0</b>     |
| PGT6   | 12%        | 21%        | 24%        | 43%        | 25               | <b>0.8</b>     | 46%        | 23%        | 15%        | 16%        | 46%              | <b>0.9</b>     |
| CT1    | 15%        | 31%        | 28%        | 26%        | 0.8              | <b>0.8</b>     | 45%        | 28%        | 17%        | 10%        | 45%              | <b>0.9</b>     |
| CT2.1  | 20%        | 36%        | 16%        | 28%        | 0.4              | <b>0.5</b>     | 49%        | 30%        | 13%        | 8%         | 49%              | <b>0.9</b>     |
| CT2.2  | 19%        | 34%        | 21%        | 26%        | 0.5              | <b>0.6</b>     | 38%        | 34%        | 19%        | 8%         | 38%              | <b>0.8</b>     |
| CT3    | 10%        | 30%        | 26%        | 34%        | <0.2             | <b>0.8</b>     | 44%        | 28%        | 18%        | 10%        | 44%              | <b>0.8</b>     |
| CT4    | 14%        | 26%        | 27%        | 32%        | <0.2             | <b>0.8</b>     | 45%        | 27%        | 18%        | 10%        | 45%              | <b>0.9</b>     |
| CT5    | 12%        | 24%        | 28%        | 35%        | 0.7              | <b>0.8</b>     | 38%        | 29%        | 19%        | 14%        | 38%              | <b>0.8</b>     |
| CT6    | 16%        | 29%        | 23%        | 32%        | 0.3              | <b>0.6</b>     | 42%        | 19%        | 19%        | 21%        | 42%              | <b>0.8</b>     |
| CT7    | 7%         | 26%        | 32%        | 35%        | 1.8              | <b>0.8</b>     | 39%        | 32%        | 19%        | 10%        | 39%              | <b>0.8</b>     |
| CT8    | 4%         | 26%        | 28%        | 41%        | 0.6              | <b>0.8</b>     | 39%        | 29%        | 19%        | 12%        | 39%              | <b>0.8</b>     |
| CT9    | 26%        | 26%        | 21%        | 27%        | 0.6              | <b>0.4</b>     | 49%        | 28%        | 15%        | 9%         | 49%              | <b>0.9</b>     |
| CT10   | 0%         | 32%        | 35%        | 33%        | 0.3              | <b>0.9</b>     | 41%        | 30%        | 19%        | 10%        | 41%              | <b>0.8</b>     |

  

|        | C18<br>(%) | C19<br>(%) | C20<br>(%) | C21<br>(%) | C22<br>(%) | C23<br>(%) | C24<br>(%) | C25<br>(%) | C26<br>(%) | C27<br>(%) | C28<br>(%) | C29<br>(%) | C30<br>(%) | ∑LCCPs | R <sup>2</sup> |
|--------|------------|------------|------------|------------|------------|------------|------------|------------|------------|------------|------------|------------|------------|--------|----------------|
| RG1    | 35%        | 14%        | 4%         | 4%         | 5%         | 7%         | 2%         | 8%         | 7%         | 6%         | 3%         | 4%         | 1%         | 35%    | <b>0.8</b>     |
| RG2    | 38%        | 13%        | 4%         | 3%         | 4%         | 6%         | 2%         | 8%         | 7%         | 6%         | 4%         | 2%         | 2%         | 38%    | <b>0.8</b>     |
| RG3    | 67%        | 18%        | 6%         | 0%         | 0%         | 2%         | 2%         | 3%         | 1%         | 2%         | 0%         | 0%         | 0%         | 67%    | <b>0.9</b>     |
| RG4.1  | 39%        | 8%         | 4%         | 3%         | 3%         | 6%         | 1%         | 9%         | 11%        | 8%         | 3%         | 2%         | 1%         | 39%    | <b>0.6</b>     |
| RG4.2  | 46%        | 15%        | 3%         | 1%         | 2%         | 5%         | 0%         | 7%         | 6%         | 5%         | 2%         | 4%         | 3%         | 46%    | <b>0.7</b>     |
| RG5    | 67%        | 21%        | 7%         | 1%         | 2%         | 2%         | 0%         | 0%         | 0%         | 1%         | 0%         | 0%         | 0%         | 67%    | <b>1.0</b>     |
| RG6    | 46%        | 13%        | 5%         | 2%         | 2%         | 6%         | 0%         | 7%         | 7%         | 5%         | 4%         | 2%         | 1%         | 46%    | <b>0.9</b>     |
| RG7    | 50%        | 18%        | 6%         | 2%         | 3%         | 5%         | 1%         | 4%         | 4%         | 3%         | 1%         | 2%         | 1%         | 50%    | <b>1.0</b>     |
| RG8    | 65%        | 22%        | 6%         | 2%         | 2%         | 1%         | 0%         | 1%         | 1%         | 0%         | 0%         | 0%         | 0%         | 65%    | <b>0.9</b>     |
| RG9    | 60%        | 23%        | 7%         | 3%         | 2%         | 1%         | 1%         | 1%         | 1%         | 0%         | 1%         | 0%         | 0%         | 60%    | <b>1.0</b>     |
| PGT1   | 67%        | 26%        | 6%         | 0%         | 0%         | 0%         | 0%         | 0%         | 0%         | 0%         | 0%         | 0%         | 0%         | 67%    | <b>1.0</b>     |
| PGT2   | 25%        | 7%         | 3%         | 1%         | 3%         | 7%         | 2%         | 11%        | 10%        | 12%        | 11%        | 6%         | 0%         | 25%    | <b>0.5</b>     |
| PGT3   | 48%        | 11%        | 10%        | 6%         | 10%        | 7%         | 0%         | 3%         | 4%         | 1%         | 0%         | 0%         | 0%         | 48%    | <b>0.8</b>     |
| PGT4   | 48%        | 19%        | 8%         | 3%         | 2%         | 5%         | 3%         | 4%         | 8%         | 0%         | 0%         | 0%         | 0%         | 48%    | <b>0.8</b>     |
| PGT5.1 | 73%        | 16%        | 8%         | 0%         | 0%         | 0%         | 0%         | 0%         | 3%         | 0%         | 0%         | 0%         | 0%         | 73%    | <b>0.9</b>     |
| PGT5.2 | 79%        | 12%        | 0%         | 0%         | 0%         | 0%         | 0%         | 2%         | 3%         | 0%         | 4%         | 0%         | 0%         | 79%    | <b>0.9</b>     |
| PGT6   | 24%        | 23%        | 21%        | 14%        | 10%        | 6%         | 0%         | 2%         | 1%         | 0%         | 0%         | 0%         | 0%         | 24%    | <b>0.5</b>     |
| CT1    | 70%        | 16%        | 9%         | 5%         | 0%         | 0%         | 0%         | 0%         | 0%         | 0%         | 0%         | 0%         | 0%         | 70%    | <b>0.9</b>     |
| CT2.1  | 44%        | 18%        | 16%        | 16%        | 0%         | 6%         | 0%         | 0%         | 0%         | 0%         | 0%         | 0%         | 0%         | 44%    | <b>0.7</b>     |
| CT2.2  | 15%        | 12%        | 15%        | 16%        | 18%        | 11%        | 1%         | 6%         | 5%         | 0%         | 0%         | 0%         | 0%         | 15%    | <b>0.2</b>     |
| CT3    | 77%        | 6%         | 8%         | 3%         | 5%         | 0%         | 0%         | 0%         | 0%         | 0%         | 0%         | 0%         | 0%         | 77%    | <b>0.9</b>     |
| CT4    | 78%        | 12%        | 3%         | 7%         | 0%         | 0%         | 0%         | 0%         | 0%         | 0%         | 0%         | 0%         | 0%         | 78%    | <b>0.8</b>     |
| CT5    | 56%        | 24%        | 6%         | 3%         | 4%         | 2%         | 1%         | 2%         | 1%         | 0%         | 1%         | 0%         | 0%         | 56%    | <b>0.9</b>     |
| CT6    | 6%         | 4%         | 5%         | 8%         | 9%         | 11%        | 3%         | 15%        | 15%        | 12%        | 8%         | 4%         | 1%         | 6%     | <b>&lt;0.1</b> |
| CT7    | 58%        | 25%        | 8%         | 2%         | 2%         | 1%         | 0%         | 1%         | 1%         | 1%         | 0%         | 0%         | 0%         | 58%    | <b>0.8</b>     |
| CT8    | 38%        | 16%        | 14%        | 8%         | 10%        | 6%         | 2%         | 3%         | 3%         | 0%         | 1%         | 0%         | 0%         | 38%    | <b>0.1</b>     |
| CT9    | 8%         | 2%         | 6%         | 2%         | 6%         | 1%         | 6%         | 10%        | 13%        | 11%        | 11%        | 12%        | 11%        | 8%     | <b>&lt;0.1</b> |
| CT10   | 79%        | 4%         | 10%        | 0%         | 7%         | 0%         | 0%         | 0%         | 0%         | 0%         | 0%         | 0%         | 0%         | 79%    | <b>&lt;0.1</b> |

54

55 Table S6. Calculated chlorination degrees for the eight technical CP mixtures.  
56  
57

|                 | Calculated Cl-degree |
|-----------------|----------------------|
| SCCP (51.5% Cl) | 55.2% Cl             |
| SCCP (55.5% Cl) | 58.4% Cl             |
| SCCP (63% Cl)   | 63.4% Cl             |
| MCCP (42% Cl)   | 48.7% Cl             |
| MCCP (52% Cl)   | 54.1% Cl             |
| MCCP (57% Cl)   | 57.4% Cl             |
| LCCP (36% Cl)   | 41.3% Cl             |
| LCCP (49% Cl)   | 49.9% Cl             |

58  
59



60 Figure S1. Measured and reconstructed CP pattern in rubber granulate (RG7) for the SCCPs, in the  
 61 playground tile (PGT4) for the MCCPs and in the car tire (CT5) for the LCCPs. The goodness of fit ( $R^2$ )  
 62 of the deconvolution is given in the figure.

63

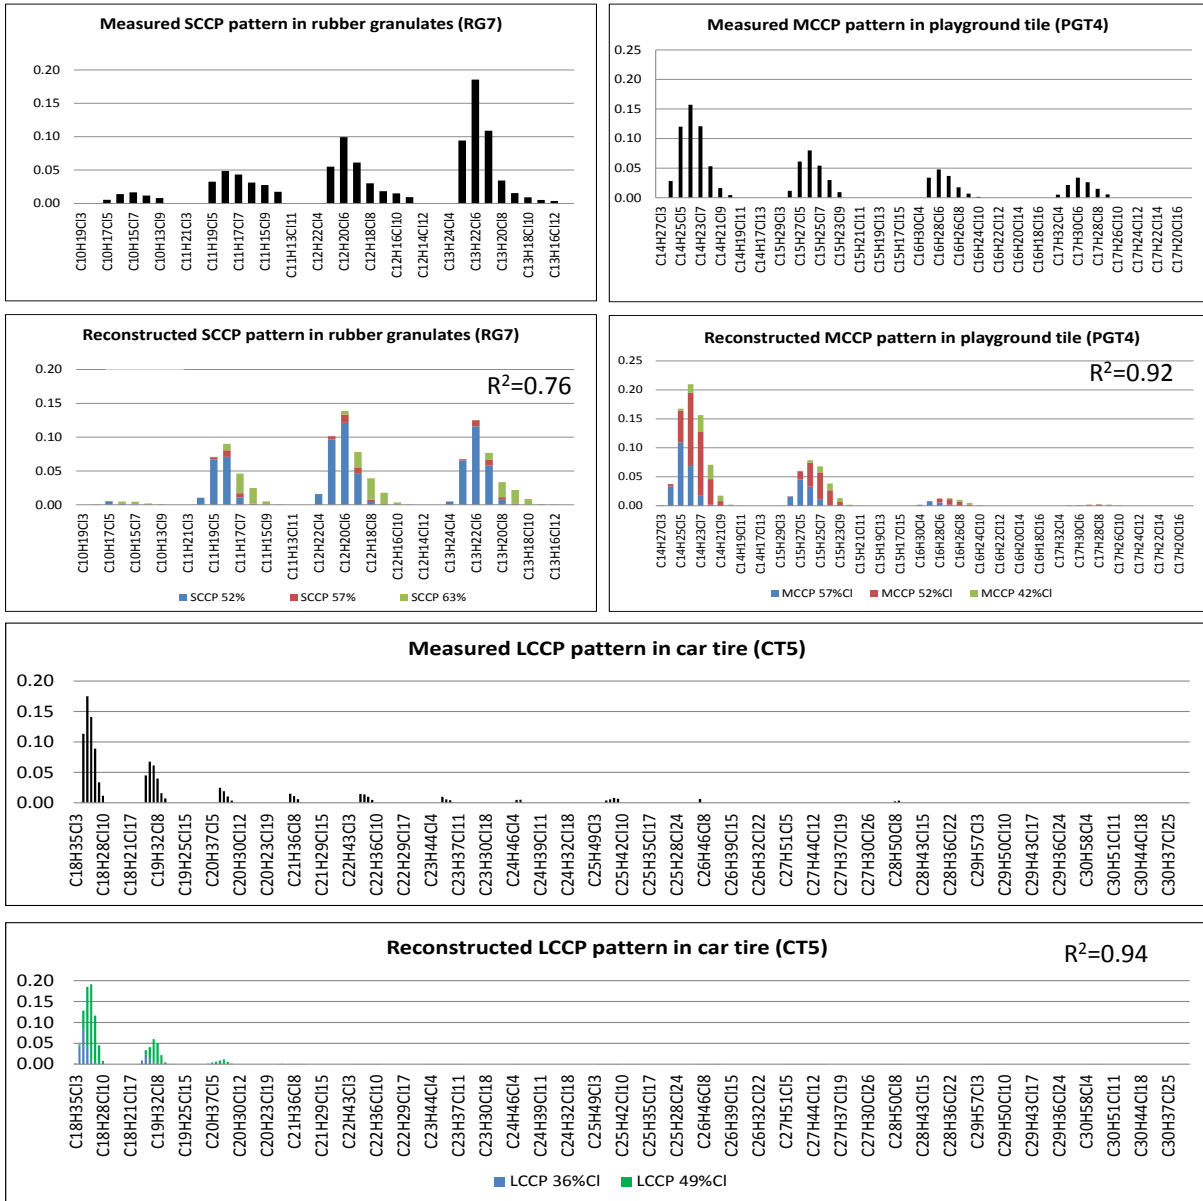

64

65

66

67 Figure S2. Measured SCCP pattern in playground tile sample PGT6, including the presence of C<sub>9</sub>.

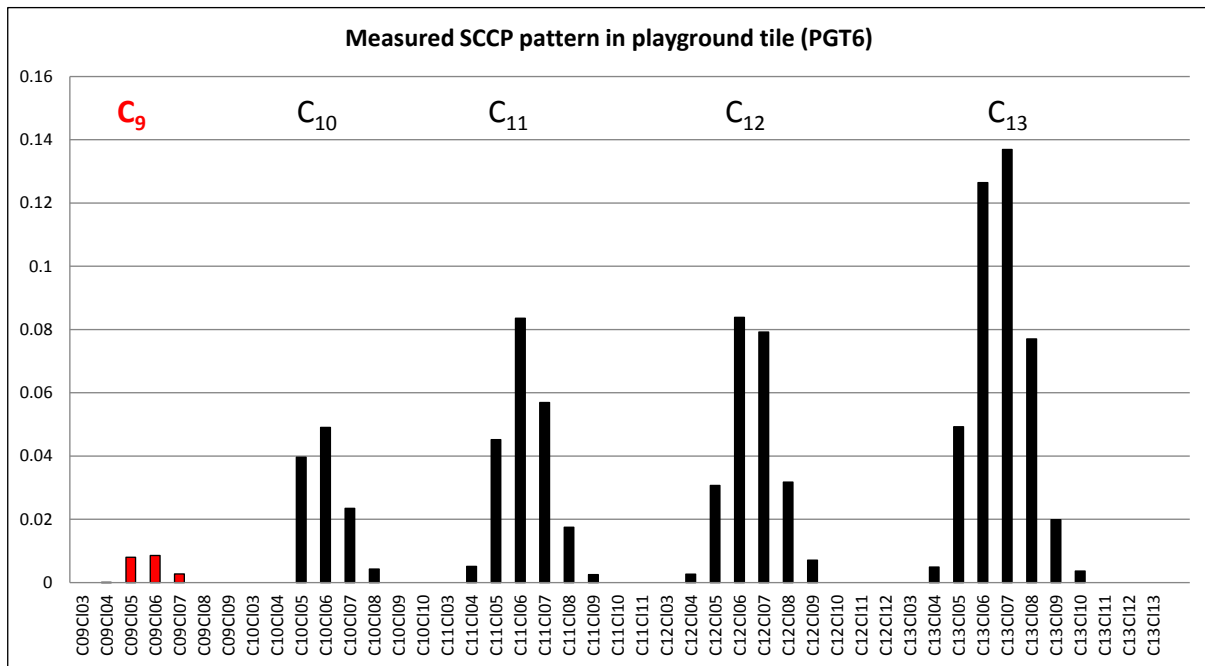

68

69
